# Supplementary material for: Transcriptomic analysis reveals the key role of histone deacetylation via mediating different phytohormone signalings in fiber initiation of cotton
Source: PubMed Central journal article supplement (PMC9277824; doi:10.1186/s13578-022-00840-4), 2022-07-12
Supplement: 13578_2022_840_MOESM4_ESM.pdf [file 13578_2022_840_MOESM4_ESM.pdf]

**Table S4 The Q-PCR primers used in this study**

| Gene name           | Gene ID             | QPCR-F                       | QPCR-R                       |
|---------------------|---------------------|------------------------------|------------------------------|
| <i>GhIAA3_A10</i>   | Gh_A10G1020         | ACCTCTTGCAGGCTCTAGAG<br>AACA | CCTAAGCCCCTGGCTTCTGAA<br>C   |
| <i>GhIAA19_D10</i>  | Gh_D10G1512         | CCGGACCTCTTGCAGGCTTT<br>AG   | CCTAAGCCCCTGGCTTCTGAA<br>C   |
| <i>GhSAUR1_D02</i>  | Gh_D02G2216         | GCCATGTTGCGGTTTATGTC<br>GG   | TGAACCCGAATTCTTCCTCGGC       |
| <i>GhSAUR12_D12</i> | Gh_D12G0291         | ACGGCGAAGATGGACTCCCT         | TCACAAGGGATGGTAAGCCCC<br>A   |
| <i>GhAUX1_A01</i>   | Gh_A01G1955         | CTTCCGTGACGCCCGCTTA          | AATCACCACCGGCAGCCGTG         |
| <i>GhSAUR31_A12</i> | Gh_A12G2237         | GCAACAACGGTTCGTGATTC<br>CGG  | ACGAAACTCCTCGACATGGCA<br>AGG |
| <i>GhSAUR50_A03</i> | Gh_A03G1766         | ACAACACGGCGGTGGCTAC<br>G     | TCGGCTCGTCGGAGTAAGCA         |
| <i>GhSAUR8_D02</i>  | Gh_D02G2199         | ACCCCTCCCTTAGACGTACC         | AACTCTTCTTCGGCTCGTCG         |
| <i>GhJAZ1_A08</i>   | Gh_A08G2199         | AGCTCCGAAAACCCGAAAA<br>CGA   | GGTAGATCGCCGGGAATGGAA<br>C   |
| <i>GhJAZ1_D05</i>   | Gh_D05G0352         | AACCGGCTAGGTCACTGGA<br>GAA   | AACAGATTCATGGTCGGAGGC<br>G   |
| <i>GhJAZ10_D02</i>  | Gh_D02G1776         | TTTGAAGAACCCGCAGGGTC<br>AG   | CTGGCAGCAGGGGTAAGAAGA<br>G   |
| <i>GhJAZ10_A03</i>  | Gh_A03G1341         | TCGATCGCCGTCTAAGCTTT<br>CG   | GACCCTGCGGGTCTTCAAAC<br>T    |
| <i>GhGID1_A08</i>   | Gh_A08G1649         | CATTCCTCCGCCAATAGTGC<br>CA   | GCACAAGGGTACCTATGCTCC<br>G   |
| <i>GhPIF3_A07</i>   | Gh_A07G1202         | ATGATGGTCCCTTTGCCTTC<br>GG   | AGCTGGGGCTCCTGTCTATTAG<br>T  |
| <i>GhERF1_D02</i>   | Gh_D02G0430         | TGACATCGAAAGCCCGACG<br>AAA   | TTATCTCCGCCGCGAACTTCC        |
| <i>GhERF1B</i>      | Gh_Sca115107<br>G01 | ATGGGGAAAGTTCGCGGCG<br>G     | CCACCACTGGCGAACCTCCG         |
| <i>GhSRK2E_D11</i>  | Gh_D11G3472         | TGTATGGTCATGCGGGGTTA<br>CG   | AAATCAGATGCCGACTCGG<br>G     |
| <i>GhAHG1_A12</i>   | Gh_A12G2380         | TGCGGTGGCGACAAACACG<br>T     | ATTGCCTCCCGCCGCGATA          |
| <i>GhPYL5_D10</i>   | Gh_D10G2388         | CTTAGCTTCAGCGTGGTCGG<br>AG   | ACAACGTACGACTCAACGGCA<br>A   |
| <i>GhPYR6_A06</i>   | Gh_A06G1418         | CCCCTACCACTCTCACGTCC<br>TT   | ACAGCGGAGCAACTGGTTA<br>G     |
